# Supplementary material for: Internet-based acceptance and commitment therapy programme ‘Happiness Mom’ for well-being: a protocol for a randomised controlled trial
Source: HighWire-hosted journal article supplement (doi:10.1136/bmjopen-2020-042167), 2021-02-01
Supplement: bmjopen-2020-042167supp001_data_supplement.pdf [file bmjopen-2020-042167supp001_data_supplement.pdf]

## Supplementary. Details of secondary outcomes.

### *Psychological distress (K6)*

Psychological distress will be evaluated using the Japanese version of the K6 [1, 2]. The K6 is a widely-used self-rating scale assessing nonspecific distress during the past 30 days. Each item of the K6 is scored on a Likert scale ranging from *never* (0) to *all of the time* (4). The total score of the K6 ranges from 0 to 24, with higher scores indicating more severe psychological distress. A score of 13 or more and between 5 to 12 on the K6 will be considered severe and moderate psychological distress, respectively [3]. The reliability and validity of the Japanese version of the K6 has been found to be satisfactory [1, 4].

### *Parental burnout*

Parental burnout will be assessed by the Parental Burnout Assessment (PBA) [5]. PBA is a 23-item with four dimensions: exhaustion in one's parental role (6 items), contrast with previous parental self (6 items), feelings of being fed up with one's parental role (5 items) and emotional distancing from one's children (3 items). Items are rated on 7-point Likert scales: *never* (0) to *every day* (6). Japanese version of PBA (PBA-J) has showed high reliability and validity [6].

### *Work engagement*

The short form of the Utrecht Work Engagement Scale, 9-items (UWES-9) will be used to assess work engagement [7]. The UWES-9 consists of three subscales (vigor, dedication and absorption) which contain three items each. The UWES-9 is a self-report 7-point rating scale (0 = *never*; 6 = *every day*). The mean scores of the three UWES subscales and the total score are computed by adding the scores and dividing the sum by the number of items in each subscale. Hence, the UWES's three subscale scores and a total score range from 0 to 6. The Japanese version of UWES-9 has showed acceptable reliability and validity [8].

### *Job performance*

Work performance will be evaluated using one item of the WHO Health and Work Performance Questionnaire (HPQ) in Japanese [9, 10]. The HPQ is a self-report measure designed to estimate the workplace costs of health problems. In this study, participants will be asked to rate their overall work performance during the past 4 weeks. Items are scored on an 11-point scale ranging from 0 (worst possible performance) to 10 (best possible performance). A high score indicates a high degree of work performance. The reliability and validity of Japanese version of HPQ have been tested [10].

### *Sick leave days*

Participants will be asked to report their number of sick leave days during the past 3 months.

#### *Intention to leave*

The intention to leave is simply by asking one original item “Are you thinking of quitting your job?”. The item is scored on a scale from 0 (*none*) to 4 (*always*). Higher scores indicate greater intention to leave. Reliability and validity of the Japanese version have not yet been determined.

#### *Job and life satisfaction (evaluative well-being)*

Job and life satisfaction will be assessed by each one item of the Brief Job Stress Questionnaire (BJSQ) [11-13]. The job and life satisfaction score are estimated on a 4-point Likert-type scale by asking “I am satisfied with my job (family life)”.

#### *Positive feelings (hedonic well-being)*

Positive adjectives were measured by 10 items (e.g., enthusiastic, strong, inspired, proud, active, interested, excited, alert, determined, attentive) from *The Positive and Negative Affect Schedule (PANAS)* [14], which is a widely used mood measurement and regarded as one of the indicators of hedonic well-being. In addition, positive affect was each measured by six items (i.e., cheerful, in good spirits, extremely happy, calm and peaceful, satisfied, full of life), because such low arousal positive feeling has been reported to have stronger link with health among Japanese people, other than high arousal feelings, measured by PANAS [15]. Other than them, two items (i.e., close to others and confident) were added in terms of cultural affinity. These 18 items were used in the previous large population-based cohort study in Japan [16]. This study used the past 30 days as the time frame. All items were rated on a 5-point Likert-type scale, ranging from 1 “*None of the time*” to 5 “*All of the time*”. Scales were constructed by calculating the mean across each set of items. Higher scores indicate greater positive feeling. Positive feeling scales in this questionnaire is well validated elsewhere [15].

#### *Perceived social support from the partner*

Perceived social support from the partner was measured in an original visual analogue scale (range: 0 - 100) by asking two questions: “How much emotional support does your partner (e.g. your spouse) provide for you? Please answer on a scale of 0 to 100.” and “How much housework and childcare does your partner (e.g. your spouse) provide?”. This scale will be shown only for participants who answer they are married.

#### *Social support*

Social support was assessed using the Japanese short (7-item) version of the self-rating Multidimensional Scale of Perceived Social Support (MSPSS) [17, 18]. It assesses perceived support

from each of three sources: family (2 items), friends (3 items) and a significant other (2 items). The scale uses a 7-point Likert scale, ranging from *very strongly disagree* (1) to *very strongly agree* (7), with higher scores suggesting greater levels of perceived social support. The mean score of 7 items is used as a total score. Japanese short version of MSPSS has been shown acceptable reliability and validity [19].

#### *Global fear and worry about COVID-19*

Global fear and worry about COVID-19 was assessed by a single item [20]: “Do you feel anxiety about COVID-19?” Responses were rated along a 6-point Likert-type scale ranging from 1 “*Not at all*” to 6 “*Feel strongly*.”

#### *Euthymia*

Euthymia, which is newly stated concept by Fava in 2016, is a transdiagnostic construct for representing a psychological flexibility, a unifying outlook on life, and resistance to stress (i.e., resilience and tolerance to anxiety and frustration) [21, 22]. The Euthymia scale (ES) is a 10-item measurement with two answer options dichotomously as False (0) or True (1), resulting in a total ranging from 0 to 10, with higher scores indicating a better euthymic state. The Japanese version of ES shows high reliability (Cronbach’s alpha; 0.832).

#### **Reference on Supplementary**

1. Furukawa, T.A., et al., *The performance of the Japanese version of the K6 and K10 in the World Mental Health Survey Japan*. Int J Methods Psychiatr Res, 2008. **17**(3): p. 152-8.
2. Kessler, R.C., et al., *Short screening scales to monitor population prevalences and trends in non-specific psychological distress*. Psychol Med, 2002. **32**(6): p. 959-76.
3. Prochaska, J.J., et al., *Validity study of the K6 scale as a measure of moderate mental distress based on mental health treatment need and utilization*. Int J Methods Psychiatr Res, 2012. **21**(2): p. 88-97.
4. Sakurai, K., et al., *Screening performance of K6/K10 and other screening instruments for mood and anxiety disorders in Japan*. Psychiatry Clin Neurosci, 2011. **65**(5): p. 434-41.
5. Roskam, I., M.E. Brianda, and M. Mikolajczak, *A Step Forward in the Conceptualization and Measurement of Parental Burnout: The Parental Burnout Assessment (PBA)*. Front Psychol, 2018. **9**: p. 758.
6. 川本, 大., M. Alimardani, and 嘉. 古谷, *子育てバーンアウト評価尺度日本語版の信頼性・妥当性の検証*. 2018.
7. Schaufeli, W.B., et al., *The measurement of engagement and burnout: A two sample*

- confirmatory factor analytic approach*. Journal of Happiness studies, 2002. **3**(1): p. 71-92.
8. Shimazu, A., et al., *Work engagement in Japan: validation of the Japanese version of the Utrecht Work Engagement Scale*. Applied Psychology, 2008. **57**(3): p. 510-523.
  9. Kessler, R.C., et al., *The world health organization health and work performance questionnaire (HPQ)*. Journal of Occupational and Environmental Medicine, 2003. **45**(2): p. 156-174.
  10. Kawakami N, et al., *Construct validity and test-retest reliability of the World Mental Health Japan version of the World Health Organization Health and Performance Questionnaire Short Version: a preliminary study*. Industrial Health, 2020: p. 2019-0090.
  11. Inoue, A., et al., *Development of a short questionnaire to measure an extended set of job demands, job resources, and positive health outcomes: the new brief job stress questionnaire*. Industrial Health, 2014: p. 2013-0185.
  12. Shimomitsu, T., et al., *Investigation research report concerning prevention of disease related to work in 1997 the Ministry of Labor: III Stress measurement research group report*. Tokyo: Tokyo Medical University, 2000: p. 101-169.
  13. Wada, K., et al., *Relationship between the onset of depression and stress response measured by the Brief Job Stress Questionnaire among Japanese employees: a cohort study*. PLoS One, 2013. **8**(2).
  14. Watson, D., L.A. Clark, and A. Tellegen, *Development and validation of brief measures of positive and negative affect: the PANAS scales*. J Pers Soc Psychol, 1988. **54**(6): p. 1063-70.
  15. Clobert, M., et al., *Feeling excited or taking a bath: Do distinct pathways underlie the positive affect-health link in the U.S. and Japan?* Emotion, 2019.
  16. Ryff CD, K.S., Karasawa M, Markus H, Kawakami N, Coe C. , *Survey of Midlife Development in Japan (MIDJA), April–September, 2008 [Computer file]*. ICPSR30822-v2. , 2008.
  17. Iwasa, H., et al., *Reliability and validity of “Social Support Scale”, Japanese language edition: Investigation targeting middle and old age*. Indicators of social welfare, 2007. **54**: p. 26-33.
  18. Zimet, G.D., et al., *The multidimensional scale of perceived social support*. Journal of personality assessment, 1988. **52**(1): p. 30-41.
  19. 岩佐一, 榎藤恭之, and 増井幸恵, 日本語版「ソーシャル・サポート尺度」の信頼性ならびに妥当性--中高年者を対象とした検討. 厚生指針, 2007. **54**(6): p. 26-33.
  20. Sasaki, N., et al., *Workplace responses to COVID-19 associated with mental health and work performance of employees in Japan*. Journal Of Occupational Health, 2020.
  21. Fava, G.A. and P. Bech, *The Concept of Euthymia*. Psychother Psychosom, 2016. **85**(1):

- p. 1-5.
22. Fava, G.A. and J. Guidi, *The pursuit of euthymia*. World Psychiatry, 2020. **19**(1): p. 40-50.
